# Supplementary figures and images for: Restoration of contact inhibition in human glioblastoma cell lines after MIF knockdown
Source: Springer Nature journal article supplement (doi:10.1186/1471-2407-9-464), 2009-12-01

**A**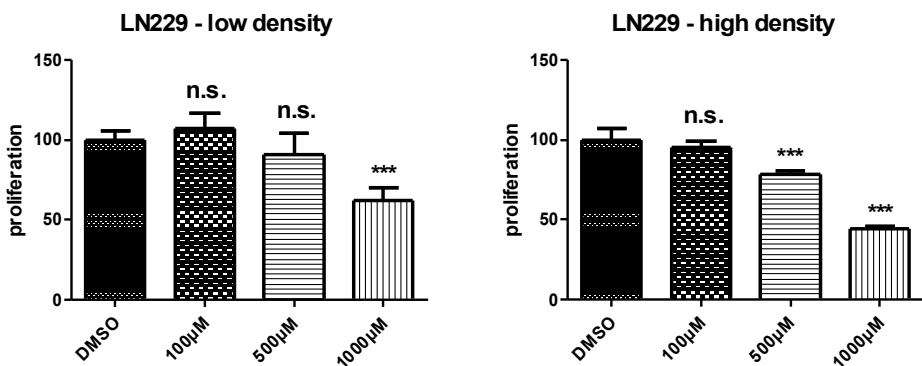**B**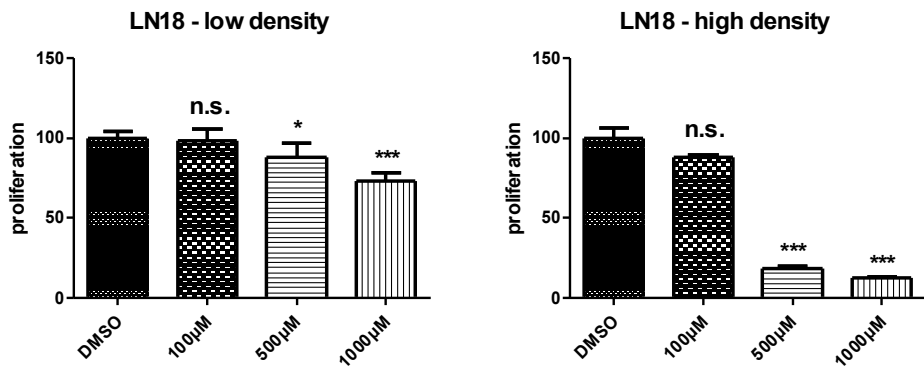**C**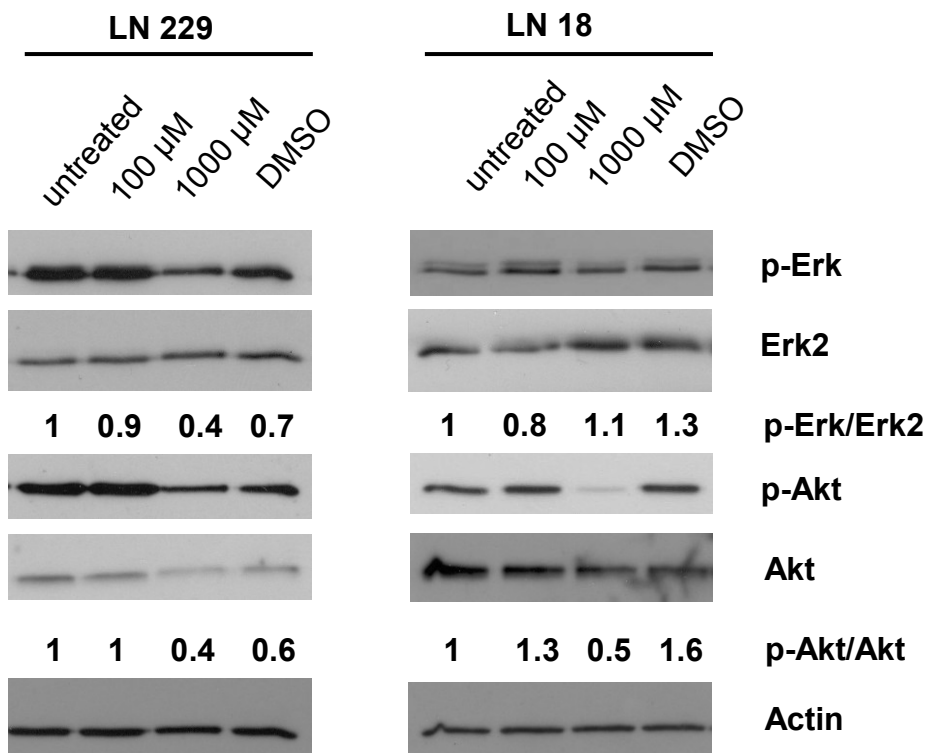

Supplement: 12885_2009_1798_MOESM10_ESM.pdf [file 12885_2009_1798_MOESM10_ESM.pdf]

**A**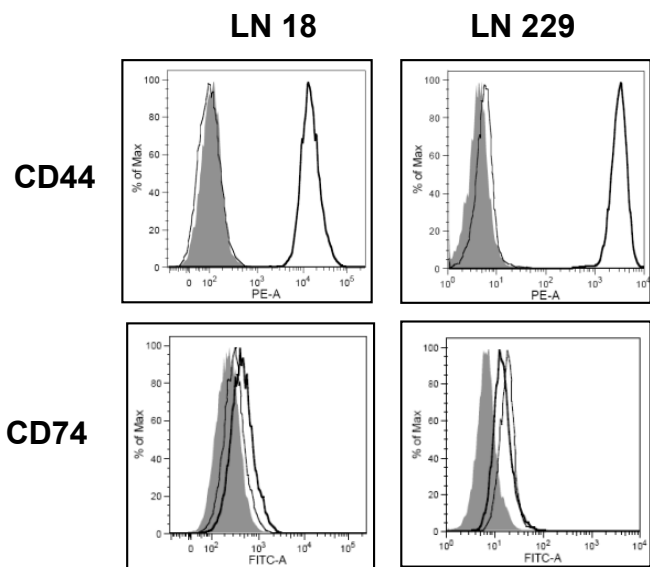**B**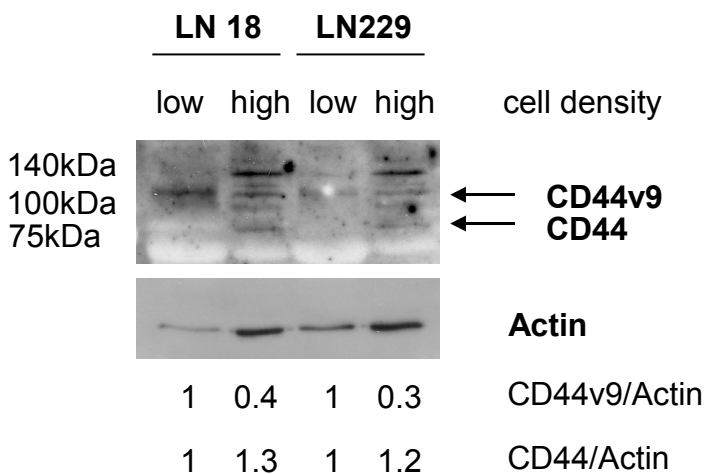**C**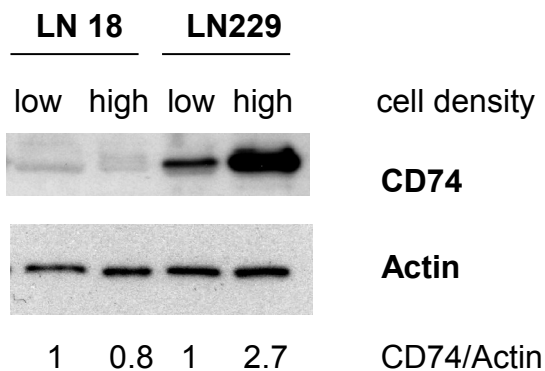

Supplement: 12885_2009_1798_MOESM11_ESM.pdf [file 12885_2009_1798_MOESM11_ESM.pdf]

**A**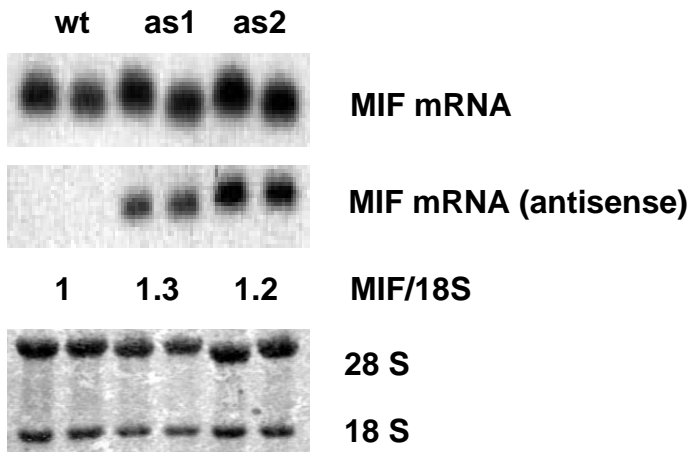**B**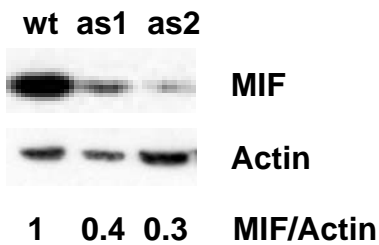**C**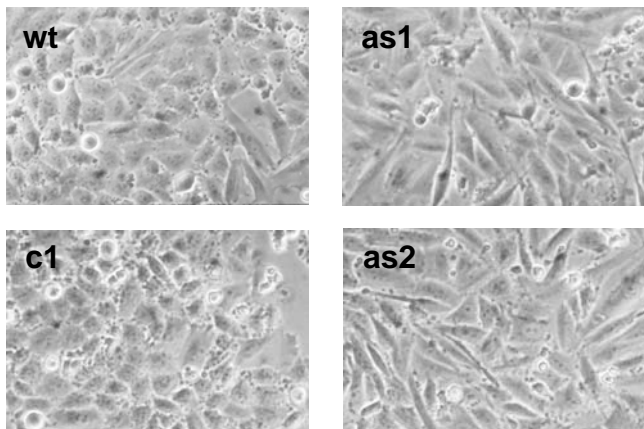

Supplement: 12885_2009_1798_MOESM5_ESM.pdf [file 12885_2009_1798_MOESM5_ESM.pdf]

**A**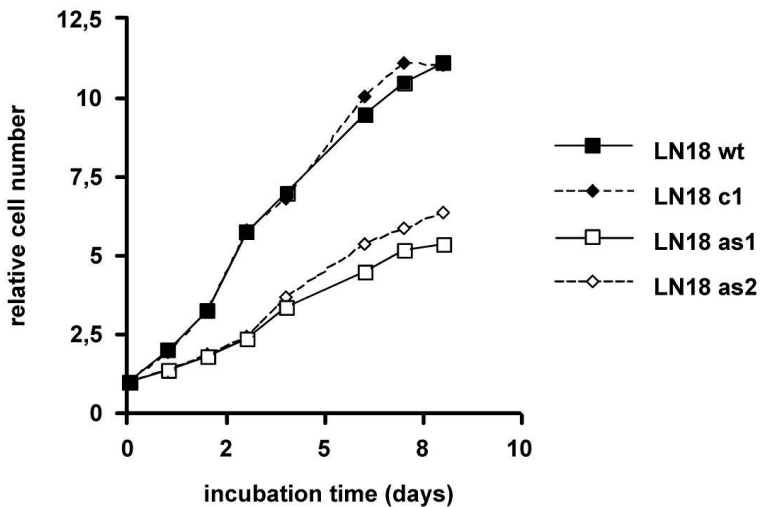**B**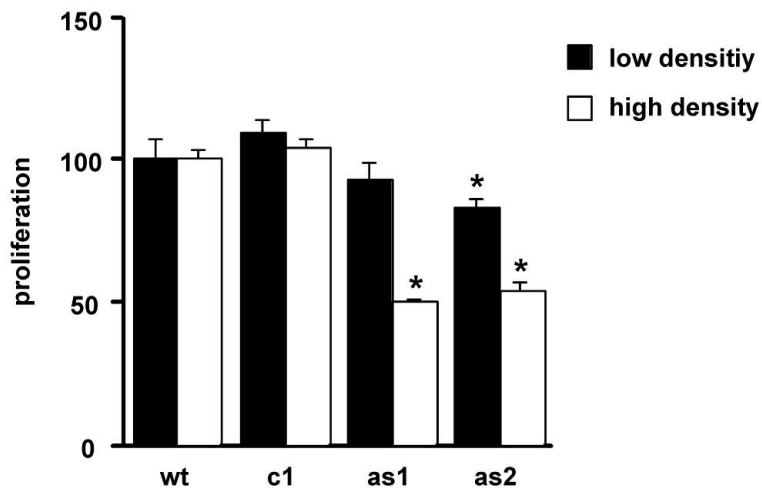

Supplement: 12885_2009_1798_MOESM6_ESM.pdf [file 12885_2009_1798_MOESM6_ESM.pdf]

**A**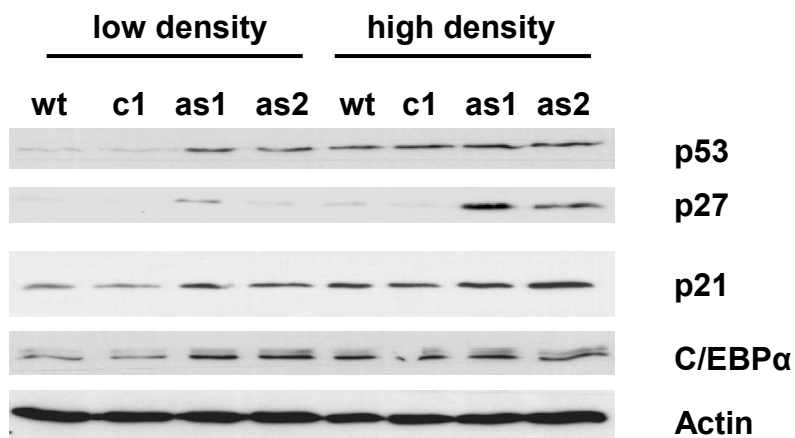**B**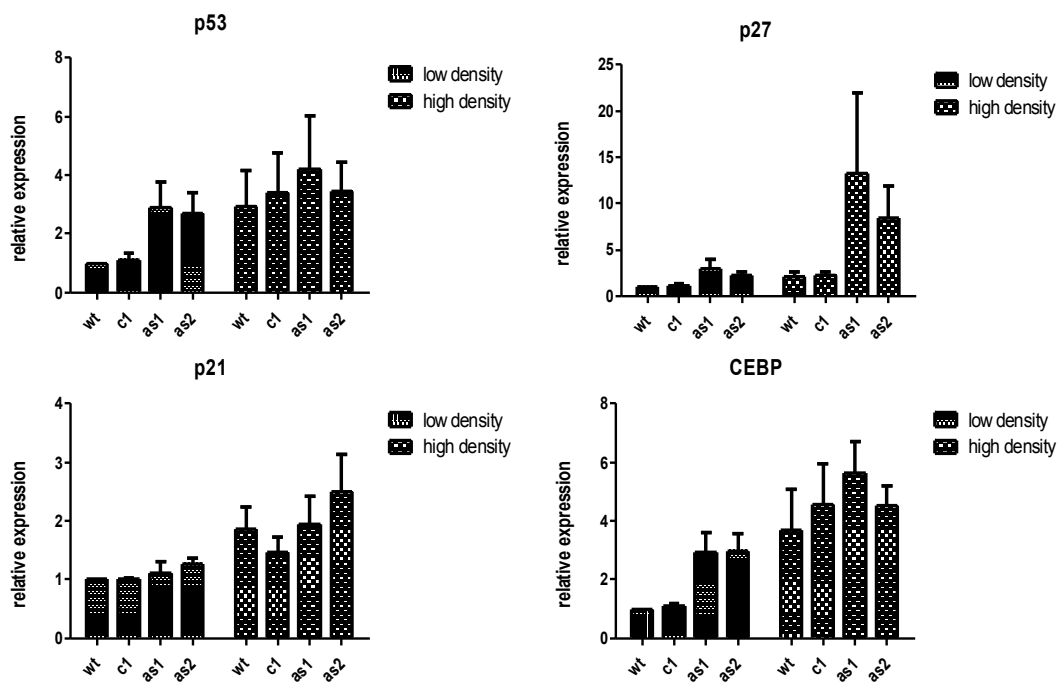**C**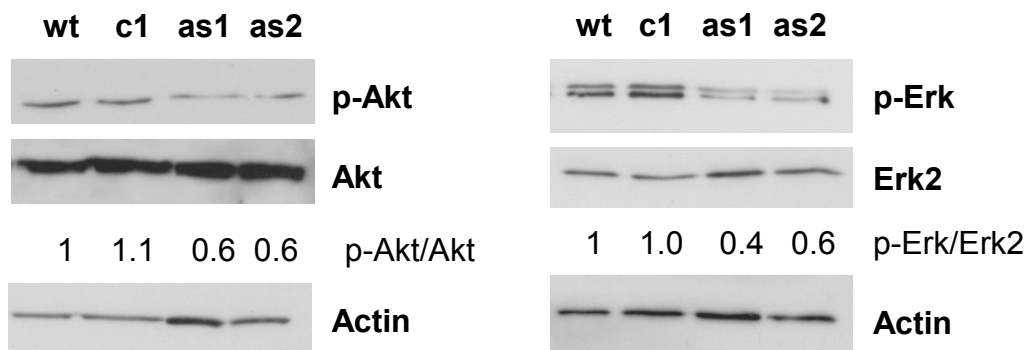

Supplement: 12885_2009_1798_MOESM7_ESM.pdf [file 12885_2009_1798_MOESM7_ESM.pdf]

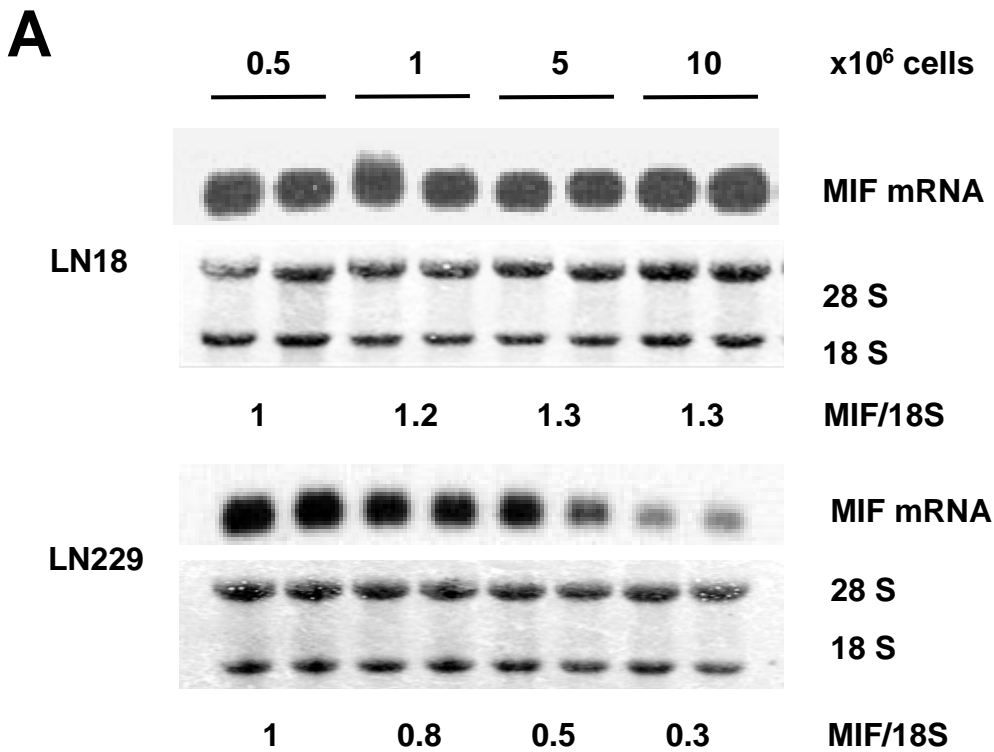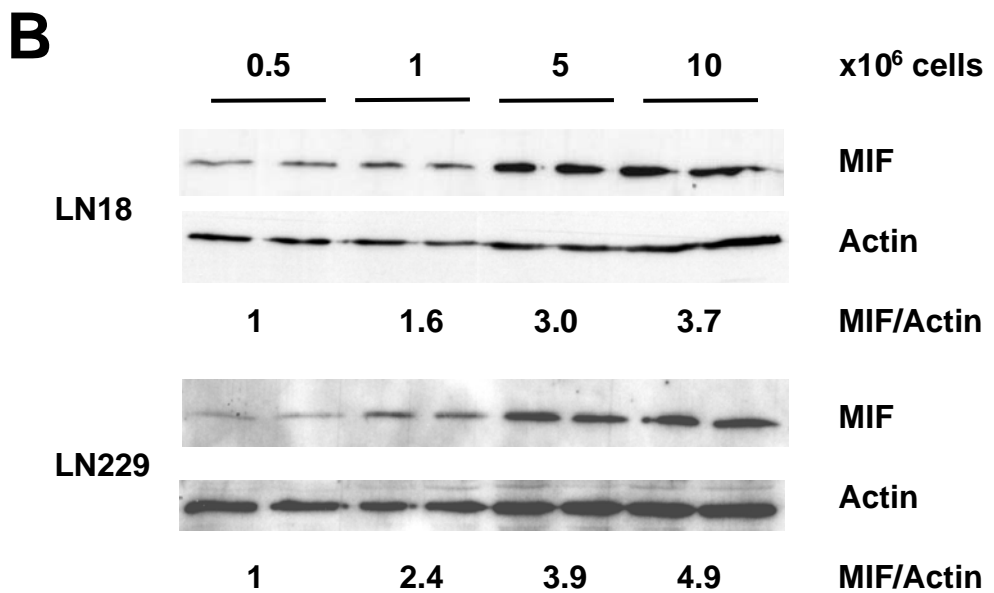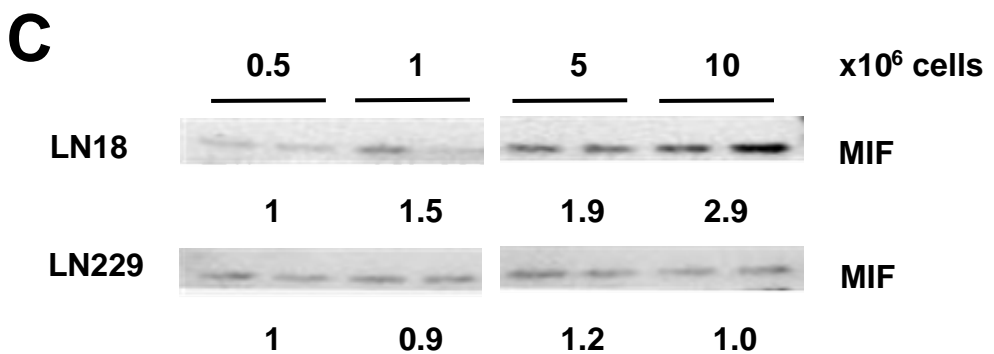

Supplement: 12885_2009_1798_MOESM8_ESM.pdf [file 12885_2009_1798_MOESM8_ESM.pdf]

**A**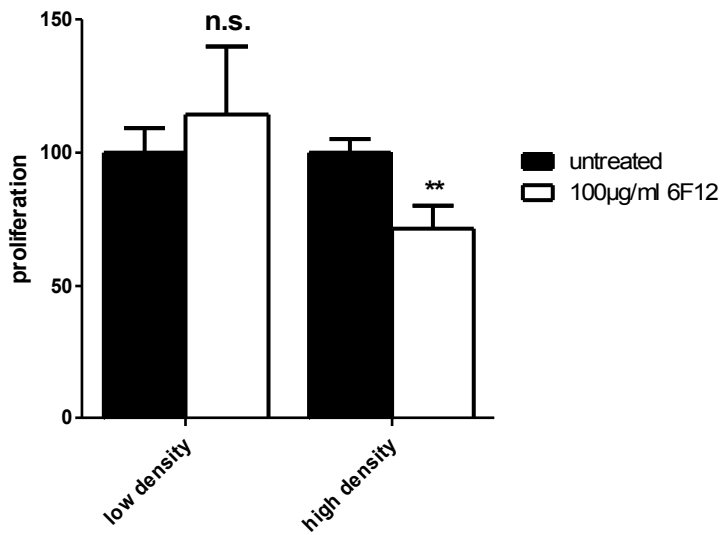**B**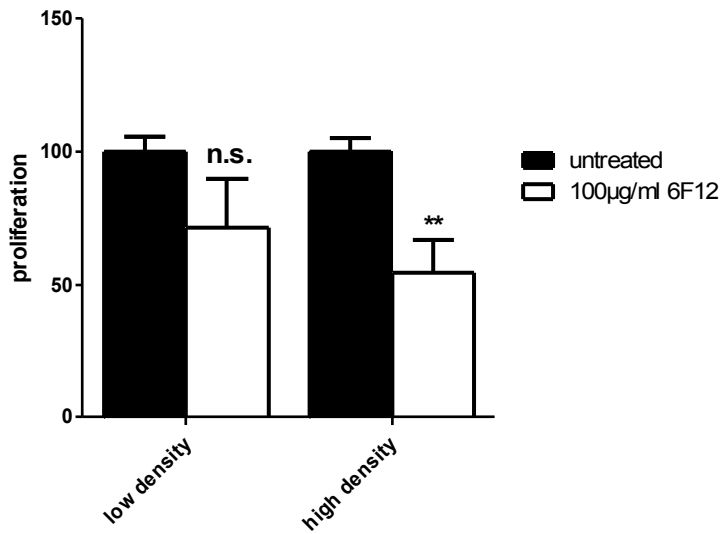

Supplement: 12885_2009_1798_MOESM9_ESM.pdf [file 12885_2009_1798_MOESM9_ESM.pdf]
